# Supplementary material for: Rigid thermosetting epoxy/multi-walled carbon nanotube foams with enhanced conductivity originated from a flow-induced concentration effect
Source: Royal Society of Chemistry journal article supplement (doi:10.1039/c6ra02310j), 2016-01-01
Supplement: c6ra02310j1.pdf [file c6ra02310j1.pdf]

**Electronic Supplementary Information (ESI)**

**Rigid thermosetting epoxy/multi-walled carbon nanotube foams with enhanced conductivity originated from a flow-induced concentration effect**

Yu Xu, Ying Li, Jianjun Bao, Tao Zhou and Aiming Zhang

State Key Laboratory of Polymer Materials Engineering of China, Polymer Research Institute of Sichuan University, Chengdu, Sichuan 610065, China.

**1. Materials**

**Table S1.** Properties of epoxy resin.

| Trade name | EEW<br>g/eq. | Color<br>(Gardner) | Flash point<br>°C | Viscosity (25 °C)<br>cps | Density<br>g/cm <sup>3</sup> | HC<br>ppm |
|------------|--------------|--------------------|-------------------|--------------------------|------------------------------|-----------|
| NPEL-128   | 184-190      | 1.0                | > 150             | 12000-15000              | 1.16                         | < 1000    |

EEW, epoxy epoxide equivalent; HC, hydrolysable chlorine

**Table S2.** Properties of Polyether Amine.

| Trade name | AHEW<br>g/eq | Gel time<br>min | Proportion<br>PHR | Viscosity (25 °C)<br>mPa·s | Curing condition       |
|------------|--------------|-----------------|-------------------|----------------------------|------------------------|
| EC-301     | ~ 61         | >550            | 32                | 9-10                       | 2 h/80 °C + 3 h/125 °C |

AHEW, amine hydrogen equivalent weight; PHR, parts of hundreds of resin (EEW, 180-190 g/eq)

**Table S3.** Properties of MWCNTs.

| Properties           | Parameters              | Properties   | Parameters              |
|----------------------|-------------------------|--------------|-------------------------|
| Outer Diameter       | 10-30 nm                | Conductivity | > 100 S/cm              |
| Inner Diameter       | 5-10 nm                 | Tap density  | 0.14 g/cm <sup>3</sup>  |
| Purity               | > 90 wt%                | True density | ~ 2.1 g/cm <sup>3</sup> |
| Length               | 10-30 μm                | Ash          | < 8 wt%                 |
| Special Surface Area | > 140 m <sup>2</sup> /g |              |                         |

**Table S4.** Properties of EXPANCEL™.

| Trade name | Particle size<br>μm | Densities<br>g/cm <sup>3</sup> | T <sub>start</sub><br>°C | T <sub>max</sub><br>°C |
|------------|---------------------|--------------------------------|--------------------------|------------------------|
| 031DU40    | 10-16               | < 0.012                        | 32                       | 9-10                   |

T<sub>start</sub>, start expansion temperatures; T<sub>max</sub> maximum allowable temperatures

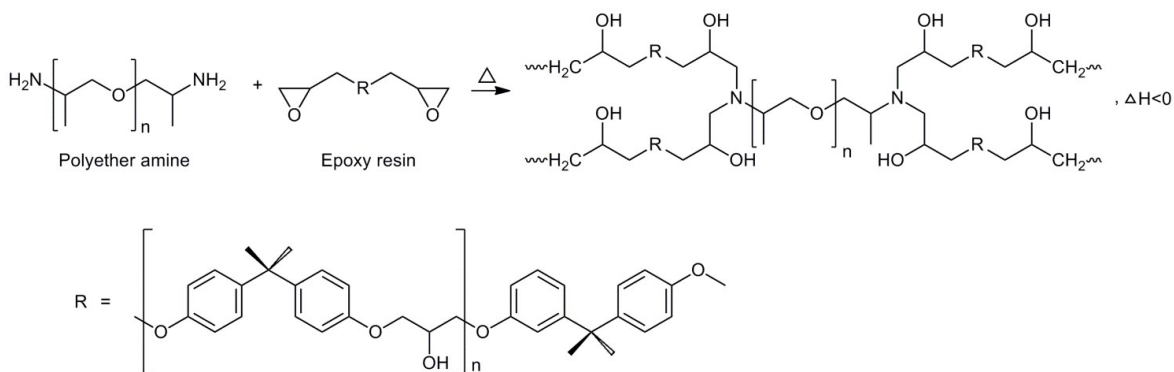

**Fig. S1.** Chemical reaction of epoxy resin with polymer amine.

## 2. Foam structures

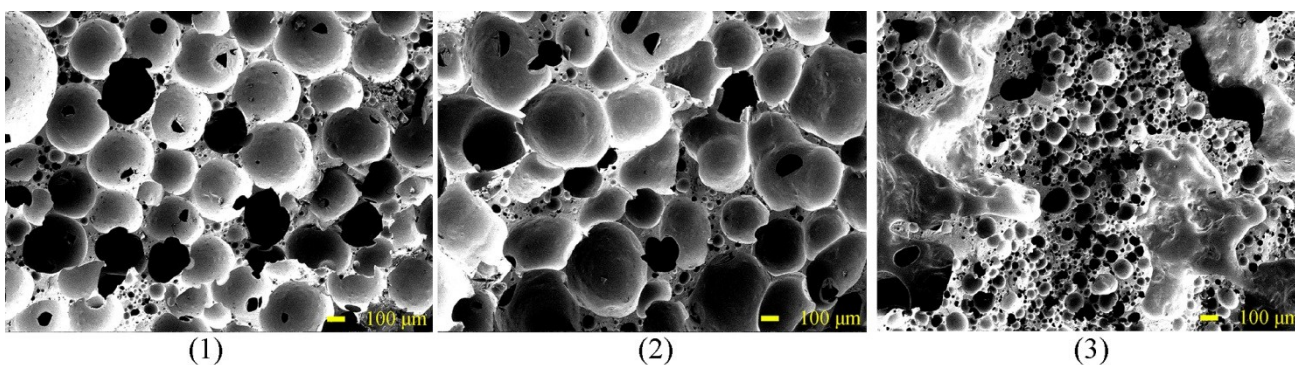

**Fig. S2.** SEM images of the conductive MWCNTs/epoxy foams prepared under different MWCNT contents: (1) 0.5 wt%; (2) 2 wt%; (3) 4 wt%. The weight proportion of epoxy resin to PEA, the microsphere contents, the foaming temperatures, the prepolymerization temperatures and time are respectively fixed at 100:32, 2 wt%, 80 °C, 45 °C and 90 min.

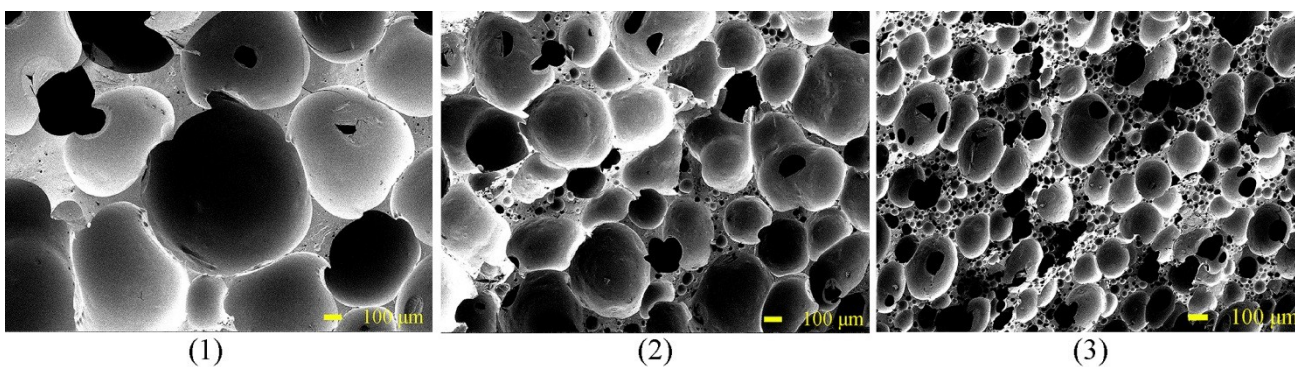

**Fig. S3.** SEM images of the conductive MWCNTs/epoxy foams prepared under different prepolymerization time: (1) 80 min; (2) 90 min; (3) 105 min. The weight proportion of epoxy resin to PEA, the microsphere contents, the MWCNT contents, the foaming temperatures, and the prepolymerization temperatures are respectively fixed at 100:32, 2 wt%, 2 wt%, 80 °C, and 45 °C.

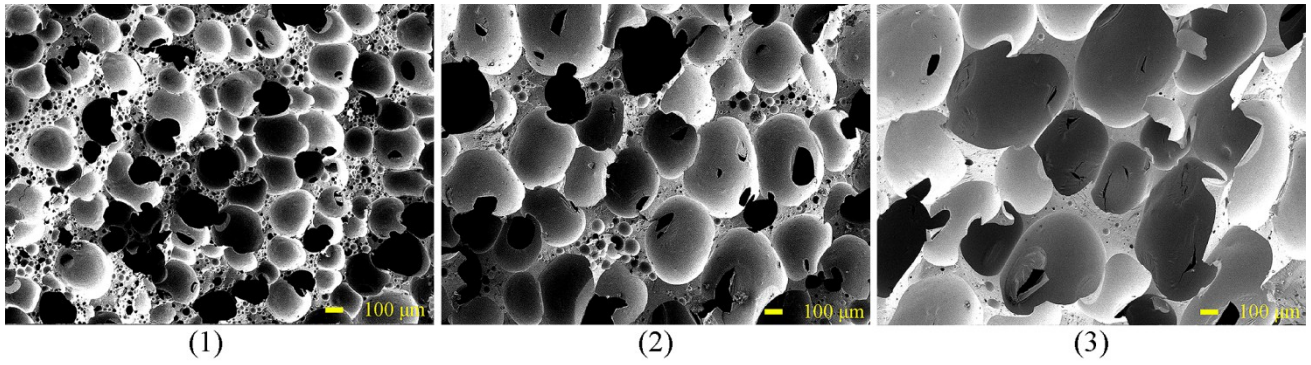

**Fig. S4.** SEM images of the conductive MWCNTs/epoxy foams prepared under different foaming temperatures: (1) 60 °C; (2) 80 °C; (3) 100 °C. The weight proportion of epoxy resin to PEA, the microsphere content, the MWCNT content, the prepolymerization temperature and time are respectively fixed at 100:32, 2 wt%, 2wt%, 45 °C and 90 min.

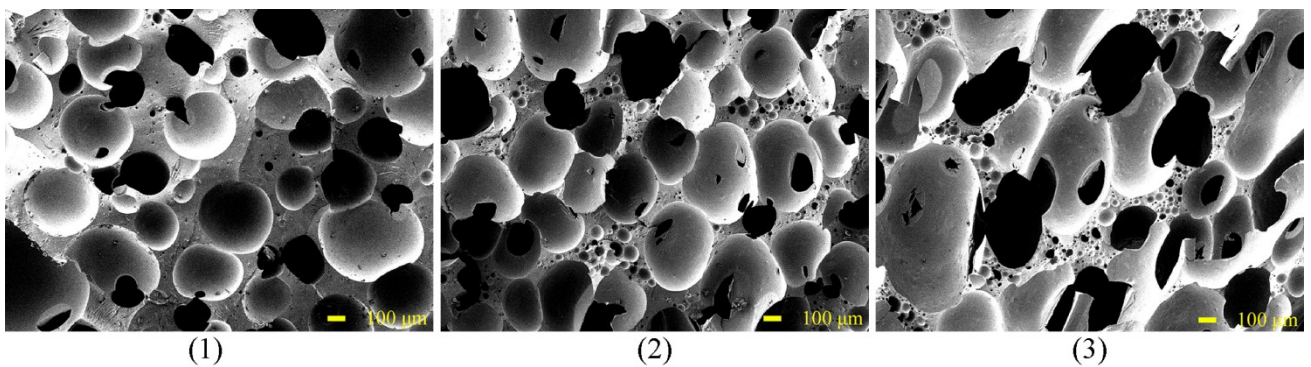

**Fig. S5.** SEM images of the conductive MWCNTs/epoxy foams prepared under different microsphere content: (1) 1 wt%; (2) 2 wt%; (3) 3 wt%. The weight proportion of epoxy resin to PEA, the MWCNT content, the foaming temperatures, the prepolymerization temperature and time are respectively fixed at 100:32, 2 wt%, 80 °C, 45 °C and 90 min.

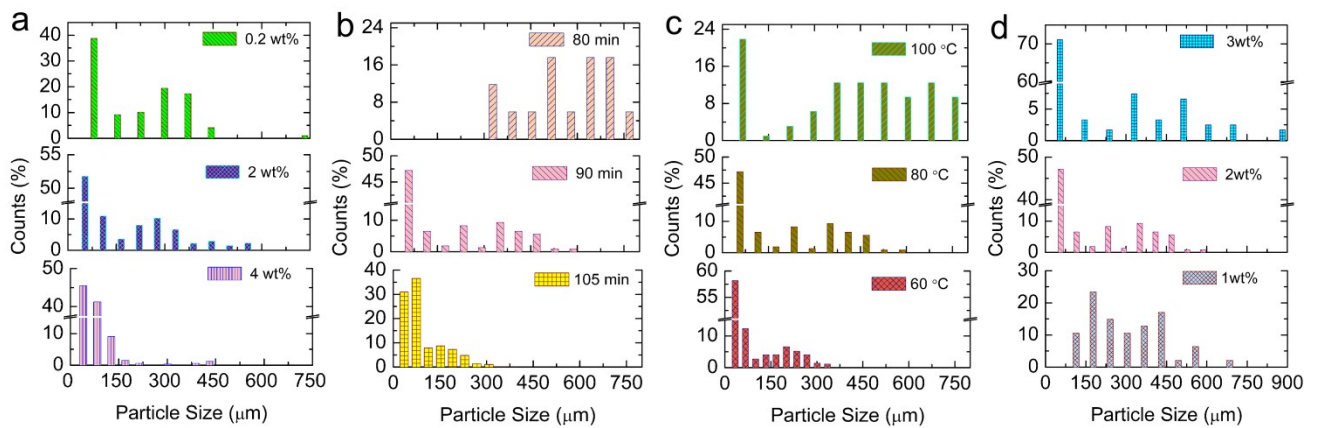

**Fig. S6.** Particle size distribution histograms corresponding to (a) Figure S2, (b) Figure S3, (c) Figure S4, and (d) Figure S5.

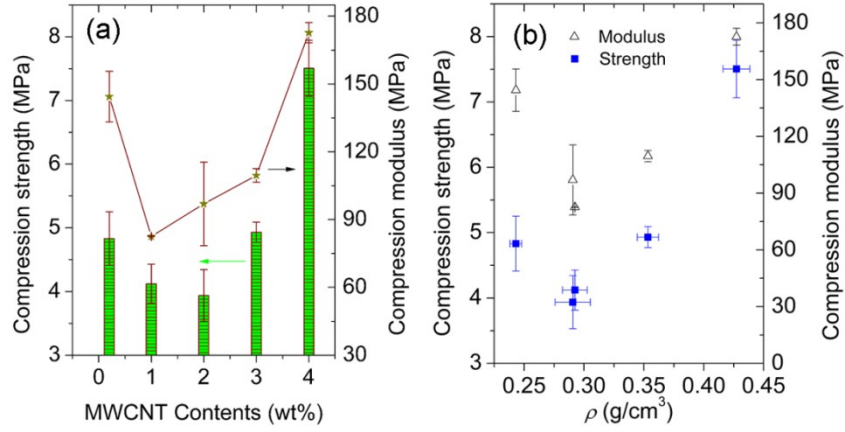

**Fig. S7** (a) Effect of MWCNT contents on the compression properties of conductive MWCNTs/epoxy foams; (b) Non-linear relationships between compression properties and densities of the foams with different MWCNT content. The preparation formula of the foams here corresponds to Group A in Table 1.

**Table S5.** Densities of MWCNTs/epoxy foams corresponding to those discussed in our studies.

| EXPANCEL<br>wt% | Density<br>g/cm <sup>3</sup> | t <sub>pre</sub><br>min | Density<br>g/cm <sup>3</sup> | T <sub>F</sub><br>(°C) | Density<br>g/cm <sup>3</sup> | MWCNT<br>wt% | Density<br>g/cm <sup>3</sup> |
|-----------------|------------------------------|-------------------------|------------------------------|------------------------|------------------------------|--------------|------------------------------|
| 1               | 0.418 ± 0.001                | 80                      | 0.243 ± 0.005                | 60                     | 0.350 ± 0.001                | 0.2          | 0.243 ± 0.005                |
| 2               | 0.292 ± 0.010                | 90                      | 0.292 ± 0.010                | 70                     | 0.310 ± 0.016                | 1            | 0.292 ± 0.010                |
| 3               | 0.192 ± 0.009                | 100                     | 0.285 ± 0.03                 | 80                     | 0.292 ± 0.010                | 2            | 0.291 ± 0.015                |
| 4               | 0.181 ± 0.007                | 105                     | 0.371 ± 0.007                | 90                     | 0.252 ± 0.008                | 3            | 0.353 ± 0.001                |
| 5               | 0.218 ± 0.001                | 115                     | 0.924 ± 0.003                | 100                    | 0.256 ± 0.005                | 4            | 0.427 ± 0.011                |

t<sub>pre</sub>, time of prepolymerization; T<sub>F</sub>, foaming temperature.
